# Supplementary material
Source: PubMed Central journal article supplement (PMC5909997)
Supplement: DB170744SupplementaryData.pdf [file DB170744SupplementaryData.pdf]

## SUPPLEMENTARY DATA

### **A novel strategy to prevent advanced atherosclerosis and lower blood glucose in a mouse model of metabolic syndrome**

Jenny E. Kanter, Farah Kramer, Shelley Barnhart, Jeffrey M. Duggan, Masami Shimizu- Albergine, Vishal Kothari, Alan Chait, Stephan D. Bouman, Jessica A. Hamerman, Bo F. Hansen, Grith S. Olsen and Karin E. Bornfeldt

**Supplementary Figure S1. Gating strategies for flow cytometry.** (A-B) Staining strategy for blood leukocytes and representative flow cytometry contour plots. (C) Gating strategy and representative flow cytometry plots for identifying LT-HSC and eGMP in bone marrow cells. All gating was determined based on staining controls containing all antibodies except one (flow minus). For analysis of bone marrow progenitor cell populations, bone marrow cells were harvested from two femurs and two tibias per mouse and erythrocytes were lysed using ACK lysis buffer (Lonza, Basel, Switzerland). Lineagenegative progenitor cells were enriched from bone marrow using a mouse Lineage Cell Depletion Kit (Miltenyi Biotec, San Diego, CA). For cell surface staining, lineagenegative progenitors were stained with PE-labeled anti-CD16/32 mAb or a combination of mouse and rat IgG at 4° C for 10 minutes, followed by staining with biotin-conjugated mAbs to CD11B, F4/80, GR1, CD11C, CD3, and NK1.1 at 4°C for 20 minutes. These lineage markers were used for negative gating during flow cytometry. Lineage-negative cells were subsequently surface stained with fluorescently-labeled mAbs to CD34, Sca- 1, CD135, Streptavidin, and CD117 at 4°C for 60-90 min. Data were acquired using a BD LSR II (BD Biosciences) and analyzed using FlowJo software (TreeStar). Long- Term Hematopoietic Stem Cells (LT-HSCs) were identified as Lineage- (Lin-) CD117<sup>+</sup> Sca-1<sup>+</sup> CD34<sup>-</sup> CD135<sup>-</sup> cells.

SUPPLEMENTARY DATA

**A. Staining strategy for blood leukocytes**

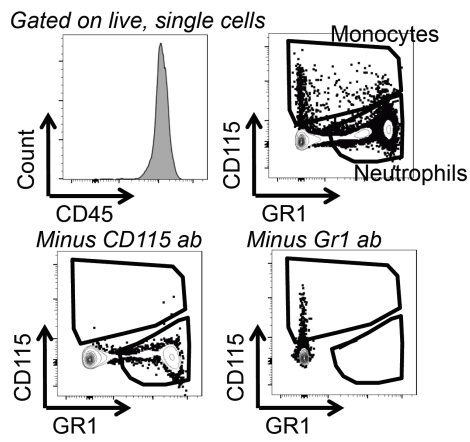

**B. Representative blood leukocyte contour plot**

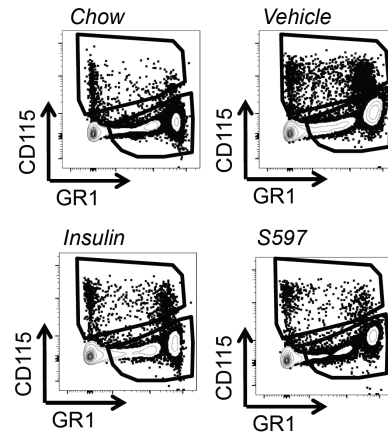

**C. Staining and gating on eGMP and LT-HSC**

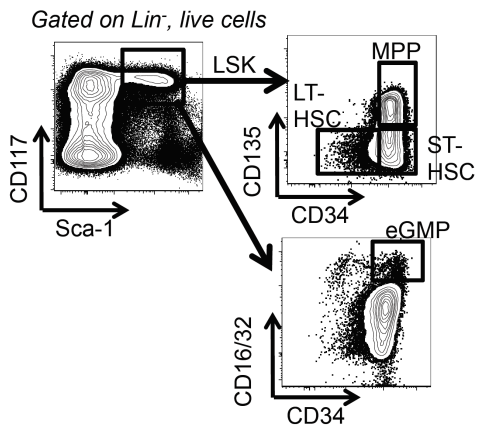

SUPPLEMENTARY DATA

**Supplementary Figure S2. Arterial lesion morphology and inflammatory markers.** (A) Examples of markers of advanced lesions in the brachiocephalic artery. Chondrocyte-like cells and calcification determined by Movat's pentachrome stain (left-most panel) and adjacent section stained with von Kossa for calcification (middle panel). A high magnification photo of a section stained for  $\alpha$ -smooth muscle actin, present both in the lesion's fibrous cap and in the media (right-most panel). (B-E) Aortic *Ccnd1* (cyclin D1), *Ccl2*, *Tnfa* and *Emr1* (F4/80) mRNA. Data were normalized to *Rn18s* values and presented using the  $\Delta\Delta$ CT method with the chow group as control. Similar results were obtained when the data were normalized to *Rpn32* or *Gapdh*. (F) Hepatic *Emr1* mRNA levels. (G) Epididymal adipose tissue *Emr1* mRNA levels. Data are expressed as mean  $\pm$  SEM, n=5 chow, DDC groups vehicle n=14, insulin n=13, S597 n=13. \*p<0.05, \*\*p<0.01, \*\*\* p<0.001 compared to chow or as indicated, one-way ANOVA.

**A. Examples of chondrocyte-like cells, calcification, and smooth muscle  $\alpha$ -actin**

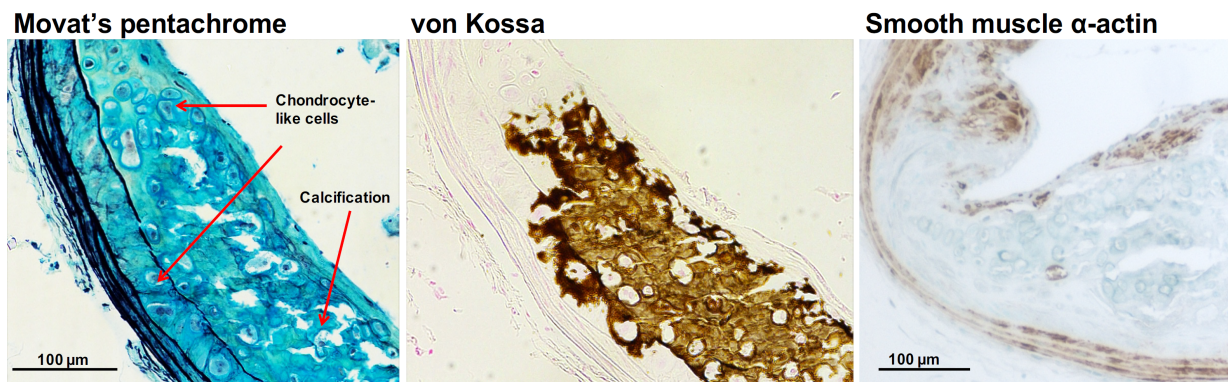

**B. Aortic *Ccnd1***

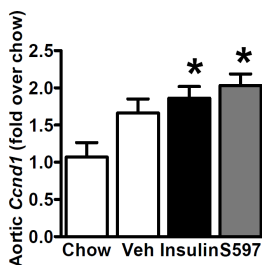

**C. Aortic *Ccl2***

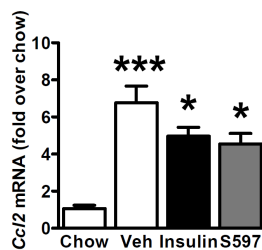

**D. Aortic *Tnfa***

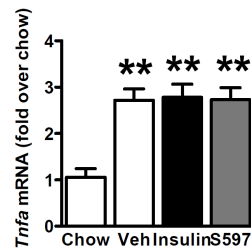

**E. Aortic *Emr1***

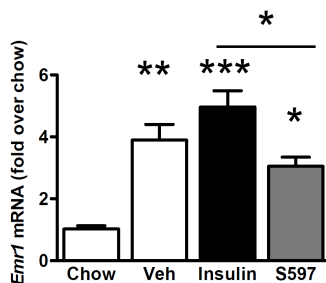

**F. Hepatic *Emr1***

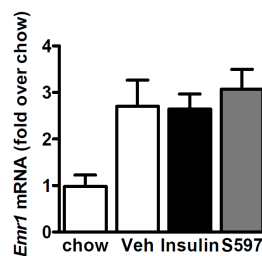

**G. Adipose tissue *Emr1***

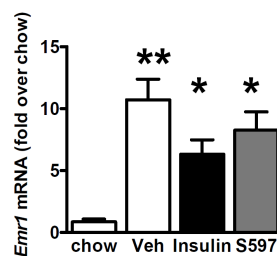

SUPPLEMENTARY DATA

**Supplementary Figure S3. S597 does not activate Akt until very high concentrations are reached in mouse endothelial cells.** Mouse endothelial cells were isolated from hearts, and Diabetes stimulated with the indicated concentrations of insulin or S597 for 15 minutes. Levels of p-Akt (Ser473) and total Akt were detected by Western blot analysis (A). (B) Results were quantified and expressed as mean  $\pm$  SEM (n=3).

**A. Example of p-Akt in mouse endothelial cells (dose-response)**

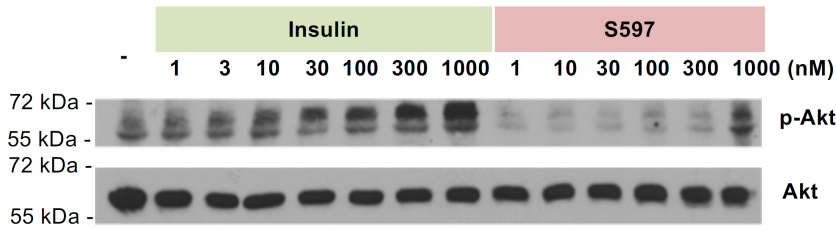

**B. Quantification of dose-response (p-Akt/total Akt)**

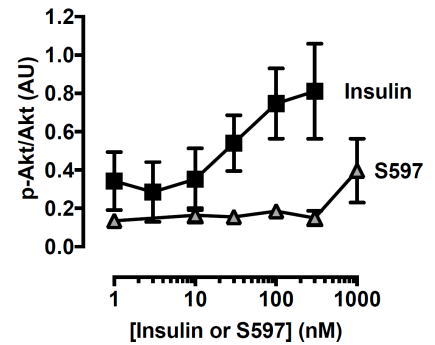

SUPPLEMENTARY DATA

**Supplementary Figure S4. S597 does not significantly affect glyated hemoglobin or hepatic expression of genes involved in lipid metabolism.** (A-B) Glycated hemoglobin was measured in plasma at the end of the study. (C-F) Livers were isolated at the end of the 22-week study and subjected to reverse transcription and real-time PCR. After each assay, a dissociation curve was run to confirm specificity of PCR amplicons. All primer reactions were analyzed on agarose gels for correct size and the presence of a single reaction product. Resulting Ct values were normalized to *Rn18s*, *Rpn32* and *Gapdh*, and the  $\Delta\Delta C_t$  method was then used to express values as fold-over control samples. All samples were run in at least duplicates, and statistical analysis was performed on  $2^{-(\Delta C_t)}$  values. (C) Hepatic *Pepck* mRNA, (D) *Hmgcr* mRNA, (E) *Scd1* mRNA, and (F) *Fasn* mRNA levels. (G) Lack of correlation between plasma triglycerides and atherosclerosis. A subset of mice had received insulin 10 minutes prior to euthanasia. Data are expressed as mean  $\pm$  SEM, chow n=5, DDC groups vehicle n=14, insulin n=13, S597 n=13, unless otherwise specified. There were no significant differences between vehicle-treated mice, insulin-treated mice and S597-treated mice. \*\* p<0.01 by two-way ANOVA.

**A. Glycated hemoglobin (mmol/mol)**

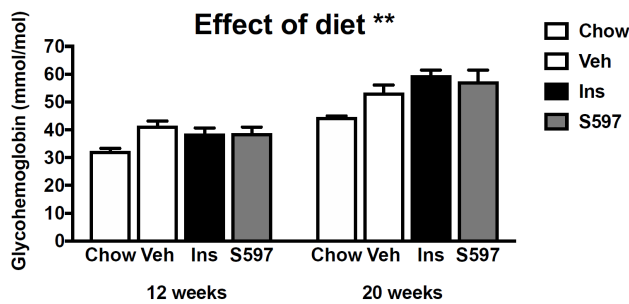

**B. Glycated hemoglobin (%)**

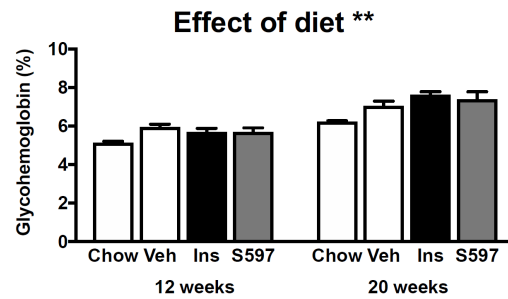

**C. Hepatic *Pepck* mRNA**

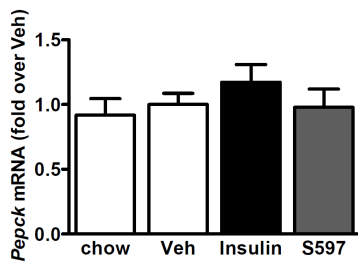

**D. Hepatic *Hmgcr* mRNA**

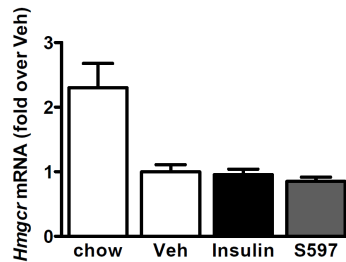

**E. Hepatic *Scd1* mRNA**

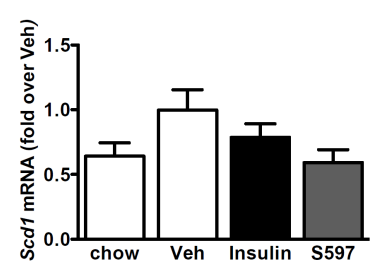

**F. Hepatic *Fasn* mRNA**

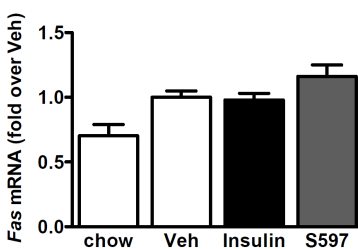

**G. Lack of plasma TG correlation with atherosclerosis**

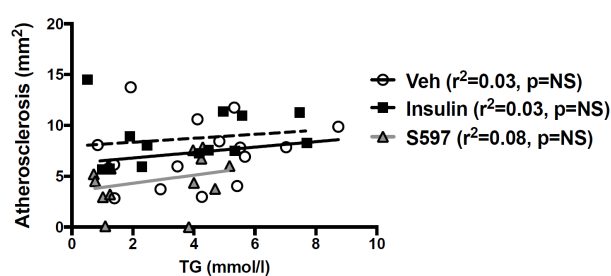

SUPPLEMENTARY DATA

**Supplementary Figure S5. S597 preferentially activates Akt over Erk at a wide range of concentrations and different time-points, and inhibits insulin-induced Erk activation in 3T3-L1 cells.** (A-B) Differentiated 3T3-L1 cells were stimulated with vehicle (Veh), 100 nM insulin, 200 nM S597, or a combination of 100 nM insulin and 200 nM S597 (A) or increasing concentrations of S597 in nM (B) for 7.5 min. Western blots were used to detect phosphorylated Akt (Ser473) and Erk (Thr202/Tyr204) and total Akt and Erk. Statistical analysis was performed by one-way ANOVA; \* $p < 0.05$  versus Veh and # $p < 0.05$  versus insulin. Results are expressed as mean  $\pm$  SEM (n=3). (C-D) Time-course studies (C) and dose-response curves (D) demonstrate that S597 and insulin are equally effective in activating Akt but that S597 is significantly less able to activate Erk over a wide range of concentrations and time-points. Results are expressed as mean  $\pm$  SEM (n=3). Statistical analysis was performed by two-way ANOVA; \* $p < 0.05$ , \*\* $p < 0.01$  S597 versus insulin.

**A. p-Akt and p-Erk in 3T3-L1 cells**

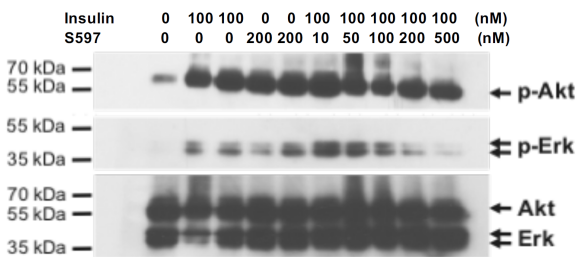

**B. p-Akt and p-Erk in 3T3-L1 cells**

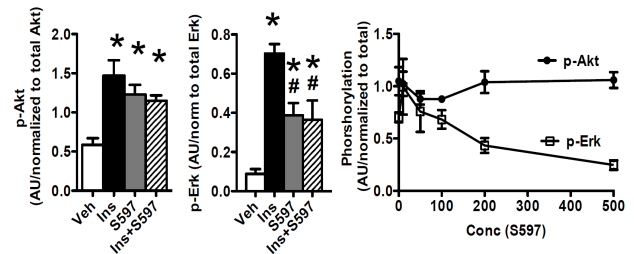

**C. p-Akt and p-Erk in 3T3-L1 cells (time-course)**

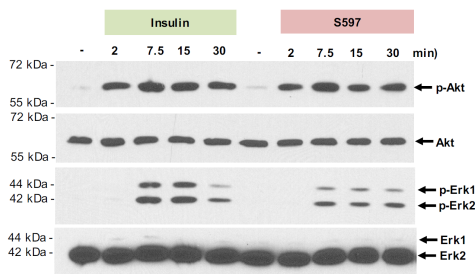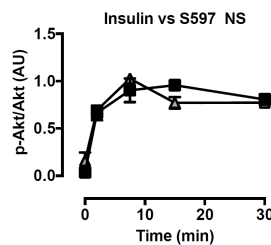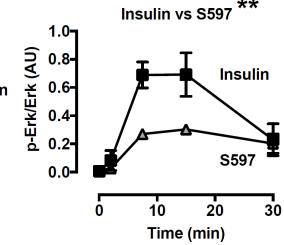

**D. p-Akt and p-Erk in 3T3-L1 cells (dose-response)**

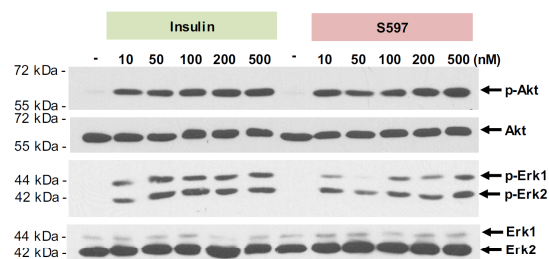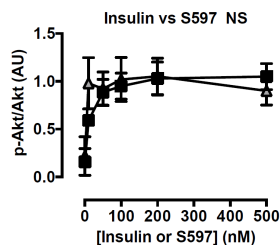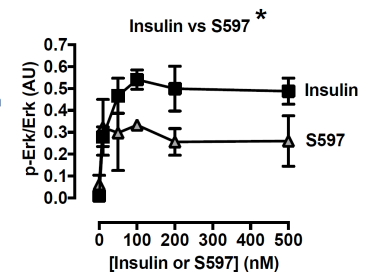

SUPPLEMENTARY DATA

**Supplementary Figure S6. S597 does not activate JNK or p38 MAPK.** Mice were injected acutely with vehicle, insulin or S597 5 minutes before euthanasia, and hepatic p-p38 MAPK (Thr180/182) (A) and p-JNK (Thr183/Tyr185) (B) were analyzed by Western blot (n=3- 4). There were no significant effects of insulin or S597. (C) Representative Western blots.

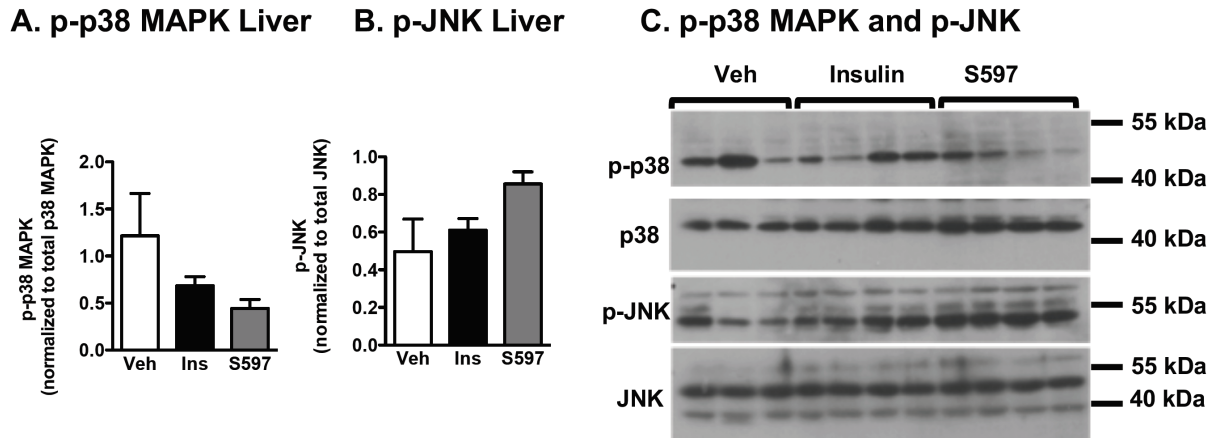

SUPPLEMENTARY DATA

**Supplementary Figure S7. S597 prevents leukocytosis associated with the metabolic syndrome phenotype.** (A-B) Mice were fed the DDC for 4 weeks and were then injected with insulin or S597 twice-daily for 4 weeks. Blood was collected from the retro-orbital plexus and analyzed using an automated Hemavet white blood cell counter (n=8 chow, n=15 for all DDC groups). Data are expressed as mean  $\pm$  SEM. \* p<0.05 compared to chow, # p<0.05 compared to vehicle treated mice, one-way ANOVA. (C) Blood Ly6C<sup>lo</sup> monocytes determined by flow cytometry and normalized to Hemavet data. (D) Emergency granulocyte-macrophage progenitor (eGMP) cell frequency in bone marrow determined by flow cytometry. Hematopoietic progenitors were isolated from Lineagelive BM cells. Long-Term Hematopoietic Stem Cells (LT-HSCs) were identified as Lineage<sup>-</sup> CD117<sup>+</sup> Sca-1<sup>+</sup> CD34<sup>-</sup> CD135<sup>-</sup> cells, and eGMPs were identified as Lineage<sup>-</sup> CD117<sup>+</sup> Sca-1<sup>+</sup> CD16/32<sup>hi</sup> CD34<sup>+</sup> cells. (E) Phospho-Erk in LSK (Lineage<sup>-</sup> CD117<sup>+</sup> Sca-1<sup>+</sup>) hematopoietic stem cells that had been sorted and then stimulated with insulin or S597. Data were analyzed by one-way ANOVA; \*p<0.05; \*\*p<0.01 as indicated. (F) Human CD34-positive progenitor cells (similar to mouse LT-HSC), from 4 donors each analyzed in 2-5 replicates were stimulated in the presence of vehicle, insulin or S597 for 7.5 minutes, and analyzed for intracellular p-Erk by flow cytometry (average from each donor is presented and data analyzed with paired two-tailed t-test; \*p<0.05).

**A. WBC (Hemavet data)**

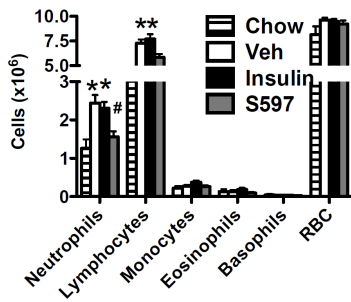

**B. Thrombocytes (Hemavet data)**

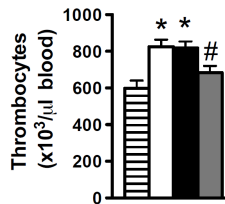

**C. Blood Ly6C<sup>lo</sup> monocytes**

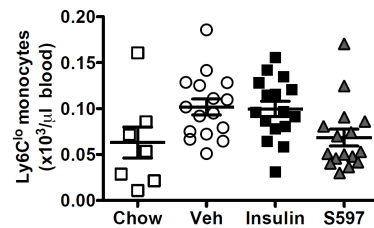

**D. eGMP frequency**

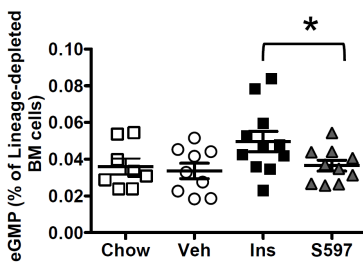

**E. p-Erk in LSK HSC**

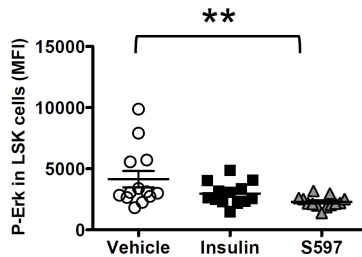

**F. p-Erk in human HPSC**

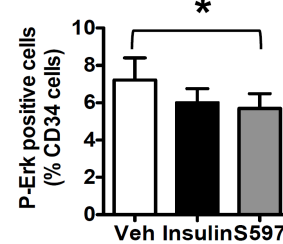



SUPPLEMENTARY DATA

**Supplementary Table 1. S597 is an insulin receptor ligand.** Radioligand binding assays, using the ligands shown in Table S1 were used. Non-specific binding was determined by co-incubation with receptor unlabeled ligand. The ability of 1  $\mu$ M S597 to compete with ligand binding was determined. The results are presented as the mean percent inhibition of specific binding in duplicate assays. Reference standards were run as an integral part of each assay to ensure the validity of the results obtained. A significant response ( $\geq 50\%$  inhibition) was evident only for S597 binding to the insulin receptor.

| Receptor/binding site          | Source                             | Ligand<br>(specific and non-specific binding)                                                     | % Inhibition<br>S597 |
|--------------------------------|------------------------------------|---------------------------------------------------------------------------------------------------|----------------------|
| Adenosine A <sub>1</sub>       | Human recombinant CHO cells        | 1.0 nmol/L [ <sup>3</sup> H] DPCPX<br>100 $\mu$ mol/L R(-)-PIA                                    | 3                    |
| Adenosine A <sub>2A</sub>      | Human recombinant HEK-293 cells    | 0.050 $\mu$ mol/L [ <sup>3</sup> H] CGS-21680<br>50.0 $\mu$ mol/L NECA                            | 17                   |
| Adenosine A <sub>3</sub>       | Human recombinant CHO-K1 cells     | 0.50 nmol/L [ <sup>125</sup> I] AB-MECA<br>1.0 $\mu$ mol/L IB-MECA                                | -1                   |
| Adrenergic $\alpha_{1A}$       | Wistar rat submaxillary gland      | 0.25 nmol/L [ <sup>3</sup> H] Prazosin<br>10.0 $\mu$ mol/L Phentolamine                           | -4                   |
| Adrenergic $\alpha_{1B}$       | Wistar rat liver                   | 0.25 nmol/L [ <sup>3</sup> H] Prazosin<br>10.0 $\mu$ mol/L Phentolamine                           | -8                   |
| Adrenergic $\alpha_{1D}$       | Human recombinant HEK-293 cells    | 0.60 nmol/L [ <sup>3</sup> H] Prazosin<br>10.0 $\mu$ mol/L Phentolamine                           | -3                   |
| Adrenergic $\alpha_{2A}$       | Human recombinant insect Sf9 cells | 1.0 nmol/L [ <sup>3</sup> H] MK-912<br>10.0 $\mu$ mol/L WB-4101                                   | 6                    |
| Adrenergic $\alpha_{2C}$       | Human recombinant insect Sf9       | 1.0 nmol/L [ <sup>3</sup> H] MK-912<br>10.0 $\mu$ mol/L WB-4101                                   | -1                   |
| Adrenergic $\beta_1$           | Human recombinant CHO-K1 cells     | 0.030 nmol/L [ <sup>125</sup> I] Cyanopindolol<br>100 $\mu$ mol/L S(-)-Propranolol                | 9                    |
| Adrenergic $\beta_2$           | Human recombinant CHO cells        | 0.20 nmol/L [ <sup>3</sup> H] CGP-12177<br>10.0 $\mu$ mol/L ICJ-118551                            | 12                   |
| Adrenergic $\beta_3$           | Human recombinant HEK-293 cells    | 0.50 nmol/L [ <sup>125</sup> I] Cyanopindolol<br>1.0 mmol/L Alprenolol                            | 6                    |
| Adrenomedullin AM <sub>1</sub> | Human recombinant insect Sf9 cells | 0.040 nmol/L [ <sup>125</sup> I] Adrenomedullin (13-52)<br>3.0 $\mu$ mol/L Adrenomedullin (22-52) | 11                   |
| Adrenomedullin AM <sub>2</sub> | Human recombinant CHO-K1 cells     | 0.040 nmol/L [ <sup>125</sup> I] Adrenomedullin (13-52)                                           | 21                   |

SUPPLEMENTARY DATA

|                                                      |                                                 |                                                                                                                                                                                                                                    |     |
|------------------------------------------------------|-------------------------------------------------|------------------------------------------------------------------------------------------------------------------------------------------------------------------------------------------------------------------------------------|-----|
| Aldosterone                                          | Wistar rat kidney                               | 3.0 µmol/L Adrenomedullin (22-52)<br>4.50 nmol/L [ <sup>3</sup> H] D-Aldosterone<br>3.0 µmol/L D-Aldosterone                                                                                                                       | -5  |
| Androgen (Testosterone) AR                           | Rat recombinant E. coli                         | 1.50 nmol/L [ <sup>3</sup> H] Mibolerone<br>10.0 µmol/L Mibolerone                                                                                                                                                                 | 1   |
| Angiotensin AT <sub>1</sub>                          | Human recombinant CHO-K1 cells                  | 0.020 nmol/L [ <sup>125</sup> I] (Sar <sup>1</sup> ,Ile <sup>8</sup> )-Angiotensin II<br>10.0 µmol/L Angiotensin II                                                                                                                | 5   |
| Angiotensin AT <sub>2</sub>                          | Human recombinant CHO-K1 cells                  | 0.050 nmol/L [ <sup>125</sup> I] CGP-42112A<br>10.0 µmol/L (Sar <sup>1</sup> ,Ile <sup>8</sup> )-Angiotensin II                                                                                                                    | 0   |
| APJ                                                  | Human recombinant CHO-K1 cells                  | 0.15 nmol/L [ <sup>125</sup> I] (Glp <sup>65</sup> ,Nle <sup>75</sup> ,Tyr <sup>77</sup> )-Apelin-13<br>1.0 µmol/L (Pyr <sup>1</sup> )-Apelin-13                                                                                   | -4  |
| Atrial Natriuretic Factor (ANF)                      | Duncan Hartley derived guinea pig adrenal gland | 0.016 nmol/L [ <sup>125</sup> I] ANF (rat)<br>1.0 µmol/L ANF (rat)                                                                                                                                                                 | -6  |
| Bombesin BB1                                         | Human recombinant CHO cells                     | 0.050 nmol/L [ <sup>125</sup> I] (Tyr <sup>4</sup> )-Bombesin<br>1.0 µmol/L Neuromedin B                                                                                                                                           | -6  |
| Bombesin BB2                                         | Human recombinant HEK-293 cells                 | 0.050 nmol/L [ <sup>125</sup> I] (Tyr <sup>4</sup> )-Bombesin<br>1.0 µmol/L GRP (human)                                                                                                                                            | -9  |
| Bombesin BB3                                         | Human recombinant Balb 3T3 cells                | 0.10 nmol/L [ <sup>125</sup> I](D-Tyr <sup>9</sup> ,β-Ala <sup>11</sup> ,Phe <sup>13</sup> ,Nle <sup>14</sup> )-BN (6-14)<br>1.0 µmol/L (D-Phe <sup>6</sup> ,β-Ala <sup>11</sup> ,Phe <sup>13</sup> ,Nle <sup>14</sup> )-BN (6-14) | -4  |
| Bradykinin B <sub>1</sub>                            | Human IMR-90 cells                              | 0.50 nmol/L [ <sup>3</sup> H] (Des-Arg <sup>10</sup> )-Kallidin<br>10.0 µmol/L (Des-Arg <sup>9</sup> ,Leu <sup>8</sup> )-Bradykinin                                                                                                | 0   |
| Bradykinin B <sub>2</sub>                            | Human recombinant Chem-1 cells                  | 0.50 nmol/L [ <sup>3</sup> H] Bradykinin<br>5.0 µmol/L Bradykinin                                                                                                                                                                  | 0   |
| Calcitonin                                           | Human T-47D cells                               | 0.030 nmol/L [ <sup>125</sup> I] Calcitonin (salmon)<br>0.5 µmol/L Calcitonin (salmon)                                                                                                                                             | 0   |
| Calcitonin Gene-Related Peptide CGRP <sub>1</sub>    | Human recombinant Chem-1 cells                  | 0.030 nmol/L [ <sup>125</sup> I] CGRP (human)<br>1.0 µmol/L α-CGRP (human)                                                                                                                                                         | 23  |
| Calcium Channel L-Type, Benzothiazepine              | Wistar rat brain                                | 2.0 nmol/L [ <sup>3</sup> H] Diltiazem<br>10.0 µmol/L Diltiazem                                                                                                                                                                    | 12  |
| Calcium Channel L-Type, Dihydropyridine              | Wistar rat cerebral cortex                      | 0.10 nmol/L [ <sup>3</sup> H] Nitrendipine<br>1.0 µmol/L Nifedipine                                                                                                                                                                | 23  |
| Calcium Channel L-Type, Phenylalkylamine             | Wistar rat brain                                | 0.40 nmol/L [ <sup>3</sup> H](-)-Desmethoxyverapamil (D-888)<br>10.0 µmol/L Methoxyverapamil (D-600)                                                                                                                               | 8   |
| Calcium Channel N-Type                               | Wistar rat frontal brain                        | 10 pmol/L [ <sup>125</sup> I] ω-Conotoxin GVIA<br>0.10 µmol/L ω-Conotoxin GVIA                                                                                                                                                     | -2  |
| Cannabinoid CB <sub>1</sub>                          | Human recombinant Chem-1 cells                  | 2.0 nmol/L [ <sup>3</sup> H] SR141716A<br>10.0 µmol/L R(+)-WIN-55,212-2                                                                                                                                                            | -10 |
| Cannabinoid CB <sub>2</sub>                          | Human recombinant CHO-K1 cells                  | 2.40 nmol/L [ <sup>3</sup> H] WIN-55,212-2<br>10.0 µmol/L R(+)-WIN-55,212-2                                                                                                                                                        | 4   |
| Chemokine CCR1                                       | Human recombinant Chem-2 cells                  | 0.10 nmol/L [ <sup>125</sup> I] MIP-1α<br>0.10 µmol/L MCP-3                                                                                                                                                                        | -2  |
| Chemokine CCR2B                                      | Human recombinant CHO-K1 cells                  | 0.10 nmol/L [ <sup>125</sup> I] MCP-1<br>0.030 µmol/L MCP-1                                                                                                                                                                        | 0   |
| Chemokine CCR4                                       | Human recombinant Chem-1 cells                  | 0.050 nmol/L [ <sup>125</sup> I] TARC<br>0.10 µmol/L TARC                                                                                                                                                                          | 7   |
| Chemokine CCR5                                       | Human recombinant HEK-293T cells                | 0.060 nmol/L [ <sup>125</sup> I] MIP-1α<br>0.10 µmol/L MIP-1β                                                                                                                                                                      | 1   |
| Chemokine CX3CR1                                     | Human recombinant Chem-1 cells                  | 0.020 nmol/L [ <sup>125</sup> I] Fractalkine<br>10 nmol/L Fractalkine                                                                                                                                                              | 1   |
| Chemokine CXCR2 (IL-8R <sub>B</sub> )                | Human recombinant CHO-K1 cells                  | 0.015 nmol/L [ <sup>125</sup> I] IL-8<br>10 nmol/L IL-8                                                                                                                                                                            | 10  |
| Cholecystokinin CCK <sub>1</sub> (CCK <sub>A</sub> ) | Human recombinant 1321-N1 cells                 | 0.80 nmol/L [ <sup>3</sup> H] L-364,718<br>1.0 µmol/L Devazepide (L-364,718)                                                                                                                                                       | -1  |
| Cholecystokinin CCK <sub>2</sub> (CCK <sub>B</sub> ) | Human recombinant Chem-1 cells                  | 0.050 nmol/L [ <sup>125</sup> I] CCK-8<br>1.0 µmol/L Sincalide                                                                                                                                                                     | 10  |
| Colchicine                                           | Wistar rat brain                                | 2.50 nmol/L [ <sup>3</sup> H] Colchicine<br>100 µmol/L Colchicine                                                                                                                                                                  | 0   |
| Corticotropin Releasing Factor CRF1                  | Human recombinant CHO-K1 cells                  | 0.050 nmol/L [ <sup>125</sup> I] (Tyr <sup>0</sup> )-CRF (ovine)<br>0.10 µmol/L Urocortin (human)                                                                                                                                  | -5  |
| Dopamine D <sub>1</sub>                              | Human recombinant CHO cells                     | 1.40 nmol/L [ <sup>3</sup> H] SCH-23390<br>10.0 µmol/L (+)-Butaclamol                                                                                                                                                              | 7   |
| Dopamine D <sub>2S</sub>                             | Human recombinant CHO cells                     | 0.16 nmol/L [ <sup>3</sup> H] Spiperone<br>10.0 µmol/L Haloperidol                                                                                                                                                                 | 29  |
| Dopamine D <sub>3</sub>                              | Human recombinant CHO cells                     | 0.70 nmol/L [ <sup>3</sup> H] Spiperone<br>25.0 µmol/L S(-)-Sulpiride                                                                                                                                                              | 0   |
| Dopamine D <sub>4.2</sub>                            | Human recombinant CHO-K1 cells                  | 0.50 nmol/L [ <sup>3</sup> H] Spiperone<br>10.0 µmol/L Haloperidol                                                                                                                                                                 | 0   |
| Dopamine D <sub>5</sub>                              | Human recombinant CHO cells                     | 2.0 nmol/L [ <sup>3</sup> H] SCH-23390<br>10.0 µmol/L Flupentixol                                                                                                                                                                  | 2   |
| Endothelin ET <sub>A</sub>                           | Human recombinant CHO-K1 cells                  | 0.030 nmol/L [ <sup>125</sup> I] Endothelin-1<br>0.10 µmol/L Endothelin-1                                                                                                                                                          | -5  |
| Endothelin ET <sub>B</sub>                           | Human recombinant CHO-K1 cells                  | 0.10 nmol/L [ <sup>125</sup> I] Endothelin-1<br>0.10 µmol/L Endothelin-1                                                                                                                                                           | -4  |
| Epidermal Growth Factor (EGF)                        | Human A431 cells                                | 0.080 nmol/L [ <sup>125</sup> I] EGF (human)                                                                                                                                                                                       | 1   |

SUPPLEMENTARY DATA

|                                            |                                     |                                                                                                      |     |
|--------------------------------------------|-------------------------------------|------------------------------------------------------------------------------------------------------|-----|
|                                            |                                     | 0.10 µmol/L EGF (human)                                                                              |     |
| Estrogen ERα                               | Human recombinant insect Sf9 cells  | 0.50 nmol/L [ <sup>3</sup> H] Estradiol<br>1.0 µmol/L Diethylstilbestrol                             | 21  |
| Estrogen ERβ                               | Human recombinant insect Sf9 cells  | 0.50 nmol/L [ <sup>3</sup> H] Estradiol<br>1.0 µmol/L Diethylstilbestrol                             | 7   |
| G Protein-Coupled Receptor GPR103          | Human recombinant HEK-293 cells     | 0.075 nmol/L [ <sup>125</sup> I] QRFP-43<br>0.5 µmol/L Orphan GPCR SP9155 agonist P518               | 10  |
| GABA <sub>A</sub> , Chloride Channel, TBOB | Wistar rat cerebral cortex          | 3.0 nmol/L [ <sup>3</sup> H] TBOB<br>200 µmol/L Picrotoxin                                           | 11  |
| GABA <sub>A</sub> , Flunitrazepam, Central | Wistar rat brain (minus cerebellum) | 1.0 nmol/L [ <sup>3</sup> H] Flunitrazepam<br>10.0 µmol/L Diazepam                                   | 14  |
| GABA <sub>A</sub> , Muscimol, Central      | Wistar rat brain (minus cerebellum) | 1.0 nmol/L [ <sup>3</sup> H] Muscimol<br>0.10 µmol/L Muscimol                                        | 30  |
| GABA <sub>B1A</sub>                        | Human recombinant CHO cells         | 4.0 nmol/L [ <sup>3</sup> H] CGP-54626<br>3.0 mmol/L GABA                                            | 3   |
| GABA <sub>B1B</sub>                        | Human recombinant CHO cells         | 4.0 nmol/L [ <sup>3</sup> H] CGP-54626<br>3.0 mmol/L GABA                                            | 2   |
| Gabapentin                                 | Wistar rat brain cortex             | 0.020 µmol/L [ <sup>3</sup> H] Gabapentin<br>100 µmol/L Gabapentin                                   | 3   |
| Galanin GAL1                               | Human recombinant HEK-293 cells     | 0.012 nmol/L [ <sup>125</sup> I] Galanin (porcine)<br>1.0 µmol/L Galanin (human)                     | 3   |
| Galanin GAL2                               | Human recombinant CHO-K1 cells      | 0.070 nmol/L [ <sup>125</sup> I] Galanin (human)<br>2.0 µmol/L Galanin (human)                       | -6  |
| Glucocorticoid                             | Human recombinant insect cells      | 5.0 nmol/L [ <sup>3</sup> H] Dexamethasone<br>10.0 µmol/L Dexamethasone                              | -4  |
| Glutamate, AMPA                            | Wistar rat cerebral cortex          | 5.0 nmol/L [ <sup>3</sup> H] AMPA<br>1.0 mmol/L L-Glutamic acid                                      | 3   |
| Glutamate, Kainate                         | Wistar rat brain (minus cerebellum) | 5.0 nmol/L [ <sup>3</sup> H] Kainic acid<br>1.0 mmol/L L-Glutamic acid                               | 10  |
| Glutamate, NMDA, Agonism                   | Wistar rat cerebral cortex          | 2.0 nmol/L [ <sup>3</sup> H] CGP-39653<br>1.0 mmol/L L-Glutamic acid                                 | -3  |
| Glutamate, NMDA, Glycine                   | Wistar rat cerebral cortex          | 0.33 nmol/L [ <sup>3</sup> H] MDL 105,519<br>10.0 µmol/L MDL 105,519                                 | 14  |
| Glutamate, NMDA, Phencyclidine             | Wistar rat cerebral cortex          | 4.0 nmol/L [ <sup>3</sup> H] TCP<br>1.0 µmol/L Dizocilpine ((+)-MK-801)                              | 7   |
| Glutamate, NMDA, Polyamine                 | Wistar rat cerebral cortex          | 2.0 nmol/L [ <sup>3</sup> H] Ifenprodil<br>10.0 µmol/L Ifenprodil                                    | -4  |
| Glycine, Strychnine-Sensitive              | Wistar rat spinal cord              | 10 nmol/L [ <sup>3</sup> H] Strychnine<br>1.0 mmol/L Glycine                                         | -14 |
| Growth Hormone Secretagogue (GHS, Ghrelin) | Human recombinant CHO-K1 cells      | 0.030 nmol/L [ <sup>125</sup> I] Ghrelin (human)<br>0.10 µmol/L Ghrelin (human)                      | 3   |
| Histamine H <sub>1</sub>                   | Human recombinant CHO-K1 cells      | 1.20 nmol/L [ <sup>3</sup> H] Pyrilamine<br>1.0 µmol/L Pyrilamine                                    | 2   |
| Histamine H <sub>2</sub>                   | Human recombinant CHO-K1 cells      | 0.10 nmol/L [ <sup>125</sup> I] Aminopotentidine<br>3.0 µmol/L Tiotidine                             | 17  |
| Histamine H <sub>3</sub>                   | Human recombinant CHO-K1 cells      | 0.40 nmol/L [ <sup>3</sup> H] N-α-Methylhistamine (NAMH)<br>1.0 µmol/L R(-)-α-Methylhistamine (RAMH) | 10  |
| Histamine H <sub>4</sub>                   | Human recombinant CHO-K1 cells      | 8.20 nmol/L [ <sup>3</sup> H] Histamine<br>1.0 µmol/L Histamine                                      | -1  |
| Imidazoline I <sub>2</sub> , Central       | Wistar rat cerebral cortex          | 2.0 nmol/L [ <sup>3</sup> H] Idazoxan<br>1.0 µmol/L Idazoxan                                         | -6  |
| Inositol Trisphosphate IP <sub>3</sub>     | Wistar rat cerebellum               | 2.50 nmol/L [ <sup>3</sup> H] 1,4,5-IP <sub>3</sub><br>1.0 µmol/L 1,4,5-IP <sub>3</sub>              | -1  |
| Insulin                                    | Wistar rat liver                    | 0.030 nmol/L [ <sup>125</sup> I] Insulin<br>1.0 µmol/L Insulin                                       | 74  |
| Interleukin IL-1                           | Mouse 3T3-SWISS cells               | 0.10 nmol/L [ <sup>125</sup> I] Interleukin-1β<br>10.0 µmol/L Interleukin-1β                         | 0   |
| Interleukin IL-6                           | Human U266 cells                    | 0.080 nmol/L [ <sup>125</sup> I] IL-6<br>10 nmol/L IL-6                                              | -9  |
| Leptin                                     | Mouse recombinant BafL46 cells      | 0.10 nmol/L [ <sup>125</sup> I] Leptin<br>0.10 µmol/L Leptin                                         | 10  |
| Leukotriene, BLT (LTB <sub>4</sub> )       | Human U937 cells                    | 0.20 nmol/L [ <sup>3</sup> H] LTB <sub>4</sub><br>2.0 µmol/L LTB <sub>4</sub>                        | -11 |
| Leukotriene, Cysteinyl CysLT <sub>1</sub>  | Human recombinant CHO-K1 cells      | 0.30 nmol/L [ <sup>3</sup> H] LTD <sub>4</sub><br>0.30 µmol/L LTD <sub>4</sub>                       | -1  |
| Leukotriene, Cysteinyl CysLT <sub>2</sub>  | Human recombinant CHO-K1 cells      | 1.30 nmol/L [ <sup>3</sup> H] LTC <sub>4</sub><br>0.5 µmol/L LTC <sub>4</sub>                        | 0   |
| Melanocortin MC <sub>1</sub>               | Human recombinant CHO-K1 cells      | 0.040 nmol/L [ <sup>125</sup> I] NDP-α-MSH<br>1.0 µmol/L NDP-α-MSH                                   | 3   |
| Melanocortin MC <sub>3</sub>               | Human recombinant HEK-293           | 0.035 nmol/L [ <sup>125</sup> I] NDP-α-MSH<br>3.0 µmol/L NDP-α-MSH                                   | 9   |
| Melanocortin MC <sub>4</sub>               | Human recombinant HEK-293           | 0.020 nmol/L [ <sup>125</sup> I] NDP-α-MSH<br>3.0 µmol/L NDP-α-MSH                                   | 3   |
| Melanocortin MC <sub>5</sub>               | Human recombinant HEK-293           | 0.035 nmol/L [ <sup>125</sup> I] NDP-α-MSH                                                           | 0   |

SUPPLEMENTARY DATA

|                                                          |                                                      | 3.0 µmol/L NDP-α-MSH                                                                                                                          |    |
|----------------------------------------------------------|------------------------------------------------------|-----------------------------------------------------------------------------------------------------------------------------------------------|----|
| Melatonin MT <sub>1</sub>                                | Human recombinant CHO-K1 cells                       | 0.050 nmol/L [ <sup>125</sup> I] 2-Iodomelatonin<br>1.0 µmol/L 6-Chloromelatonin                                                              | -8 |
| Melatonin MT <sub>2</sub>                                | Human recombinant CHO-K1 cells                       | 0.050 nmol/L [ <sup>125</sup> I] 2-Iodomelatonin<br>1.0 µmol/L 6-Chloromelatonin                                                              | 3  |
| Motilin                                                  | Human recombinant HEK-293 cells                      | 0.10 nmol/L [ <sup>125</sup> I] Motilin (human, porcine)<br>1.0 µmol/L Motilin (human, porcine)                                               | 5  |
| Muscarinic M <sub>1</sub>                                | Human recombinant CHO-K1 cells                       | 0.80 nmol/L [ <sup>3</sup> H] N-Methylscopolamine<br>1.0 µmol/L Atropine                                                                      | 2  |
| Muscarinic M <sub>2</sub>                                | Human recombinant CHO-K1 cells                       | 0.80 nmol/L [ <sup>3</sup> H] N-Methylscopolamine<br>1.0 µmol/L Atropine                                                                      | 4  |
| Muscarinic M <sub>3</sub>                                | Human recombinant CHO-K1 cells                       | 0.80 nmol/L [ <sup>3</sup> H] N-Methylscopolamine<br>1.0 µmol/L Atropine                                                                      | 5  |
| Muscarinic M <sub>4</sub>                                | Human recombinant CHO-K1 cells                       | 0.80 nmol/L [ <sup>3</sup> H] N-Methylscopolamine<br>1.0 µmol/L Atropine                                                                      | 7  |
| Muscarinic M <sub>5</sub>                                | Human recombinant CHO cells                          | 0.80 nmol/L [ <sup>3</sup> H] N-Methylscopolamine<br>1.0 µmol/L Atropine                                                                      | -3 |
| N-Formyl Peptide Receptor FPR1                           | Human recombinant Chem-2 cells                       | 0.030 nmol/L [ <sup>125</sup> I] WKYMVm<br>1.0 µmol/L fMLF                                                                                    | -4 |
| N-Formyl Peptide Receptor-Like FPRL                      | Human recombinant CHO cells                          | 0.025 nmol/L [ <sup>125</sup> I] WKYMVm<br>1.0 µmol/L WKYMVm                                                                                  | 7  |
| Neuromedin U NMU <sub>1</sub>                            | Human recombinant HEK-293 cells                      | 0.037 nmol/L [ <sup>125</sup> I] Neuromedin U-25 (porcine)<br>10.0 µmol/L Neuromedin U-8 (porcine)                                            | 2  |
| Neuromedin U NMU <sub>2</sub>                            | Human recombinant HEK-293 cells                      | 0.037 nmol/L [ <sup>125</sup> I] Neuromedin U-25 (porcine)<br>10.0 µmol/L Neuromedin U-8 (porcine)                                            | -2 |
| Neuropeptide Y Y <sub>1</sub>                            | Human SK-N-MC cells                                  | 0.015 nmol/L [ <sup>125</sup> I] Peptide YY<br>1.0 µmol/L Neuropeptide Y (human, rat)                                                         | 8  |
| Neuropeptide Y Y <sub>2</sub>                            | Human KAN-TS cells                                   | 10 pmol/L [ <sup>125</sup> I] Peptide YY<br>1.0 µmol/L Neuropeptide Y (13-36) (porcine)                                                       | 1  |
| Neurotensin NT <sub>1</sub>                              | Human recombinant HEK-293 EBNA                       | 0.020 nmol/L [ <sup>125</sup> I] Neurotensin<br>1.0 µmol/L Neurotensin                                                                        | 1  |
| Nicotinic Acetylcholine                                  | Human IMR-32 cells                                   | 0.10 nmol/L [ <sup>125</sup> I] Epibatidine<br>300 µmol/L (-)-Nicotine                                                                        | -1 |
| Nicotinic Acetylcholine α <sub>1</sub> ,<br>Bungarotoxin | Human RD cells                                       | 0.60 nmol/L [ <sup>125</sup> I] α-Bungarotoxin<br>1.0 µmol/L α-Bungarotoxin                                                                   | 0  |
| Nicotinic Acetylcholine α <sub>7</sub> ,<br>Bungarotoxin | Wistar rat brain (minus cerebellum)                  | 0.60 nmol/L [ <sup>125</sup> I] α-Bungarotoxin<br>1.0 µmol/L α-Bungarotoxin                                                                   | 1  |
| NPBW2/GPR8                                               | Human recombinant Chem-1 cells                       | 0.060 nmol/L [ <sup>125</sup> I] NPW-23<br>1.0 µmol/L (Des-Br)NPB-23                                                                          | 10 |
| Opiate δ <sub>1</sub> (OP1, DOP)                         | Human recombinant HEK-293 cells                      | 1.30 nmol/L [ <sup>3</sup> H] Naltrindole<br>1.0 µmol/L Naltrindole                                                                           | 7  |
| Opiate κ (OP2, KOP)                                      | Human recombinant HEK-293 cells                      | 0.60 nmol/L [ <sup>3</sup> H] Diprenorphine<br>10.0 µmol/L Naloxone                                                                           | 10 |
| Opiate μ (OP3, MOP)                                      | Human recombinant CHO-K1 cells                       | 0.60 nmol/L [ <sup>3</sup> H] Diprenorphine<br>10.0 µmol/L Naloxone                                                                           | -7 |
| Orphanin ORL <sub>1</sub>                                | Human recombinant HEK-293 cells                      | 0.60 nmol/L [ <sup>3</sup> H] Nociceptin<br>1.0 µmol/L Orphanin-FQ                                                                            | 1  |
| Phorbol Ester                                            | ICR mouse brain                                      | 3.0 nmol/L [ <sup>3</sup> H] PDBu<br>1.0 µmol/L PDBu                                                                                          | 5  |
| Platelet Activating Factor (PAF)                         | Human platelets                                      | 0.12 nmol/L [ <sup>3</sup> H] PAF<br>1.0 µmol/L PAF                                                                                           | 3  |
| Platelet-Derived Growth Factor<br>(PDGF)                 | Mouse 3T3 cells                                      | 0.020 nmol/L [ <sup>125</sup> I] PDGF<br>0.10 nmol/L PDGF                                                                                     | -4 |
| Potassium Channel [K <sub>A</sub> ]                      | Wistar rat cerebral cortex                           | 10 pmol/L [ <sup>125</sup> I] α-Dendrotoxin<br>10 nmol/L α-Dendrotoxin                                                                        | 0  |
| Potassium Channel [K <sub>ATP</sub> ]                    | Hamster pancreatic HIT-T15 beta cells                | 5.0 nmol/L [ <sup>3</sup> H] Glyburide<br>1.0 µmol/L Glyburide                                                                                | 22 |
| Potassium Channel [SK <sub>CA</sub> ]                    | Wistar rat brain                                     | 5.0 pmol/L [ <sup>125</sup> I] Apamin<br>0.10 µmol/L Apamin                                                                                   | 0  |
| Potassium Channel hERG                                   | Human recombinant HEK-293 cells                      | 1.50 nmol/L [ <sup>3</sup> H] Astemizole<br>10.0 µmol/L Astemizole                                                                            | 4  |
| Progesterone PR-B                                        | Human recombinant insect Sf9 cells                   | 1.40 nmol/L [ <sup>3</sup> H] Progesterone<br>1.0 µmol/L Progesterone                                                                         | 18 |
| Prostanoid CRTH2                                         | Human recombinant CHO-K1 cells                       | 1.0 nmol/L [ <sup>3</sup> H] Prostaglandin D <sub>2</sub> (PGD <sub>2</sub> )<br>1.0 µmol/L Prostaglandin D <sub>2</sub> (PGD <sub>2</sub> )  | -9 |
| Prostanoid DP                                            | Human recombinant Chem-1 cells                       | 2.0 nmol/L [ <sup>3</sup> H] Prostaglandin D <sub>2</sub> (PGD <sub>2</sub> )<br>1.0 µmol/L Prostaglandin D <sub>2</sub> (PGD <sub>2</sub> )  | 19 |
| Prostanoid EP <sub>2</sub>                               | Human recombinant HEK-293 cells                      | 4.0 nmol/L [ <sup>3</sup> H] Prostaglandin E <sub>2</sub> (PGE <sub>2</sub> )<br>10.0 µmol/L Prostaglandin E <sub>2</sub> (PGE <sub>2</sub> ) | -1 |
| Prostanoid EP <sub>4</sub>                               | Human recombinant Chem-1 cells                       | 1.0 nmol/L [ <sup>3</sup> H] Prostaglandin E <sub>2</sub> (PGE <sub>2</sub> )<br>10.0 µmol/L Prostaglandin E <sub>2</sub> (PGE <sub>2</sub> ) | 0  |
| Purinergic P <sub>2X</sub>                               | New Zealand derived albino<br>rabbit urinary bladder | 8.0 nmol/L [ <sup>3</sup> H] α, β-Methylene-ATP<br>100 µmol/L β, γ-Methylene ATP                                                              | 7  |
| Purinergic P <sub>2Y</sub>                               | Wistar rat brain                                     | 0.10 nmol/L [ <sup>35</sup> S] ATP-αS                                                                                                         | 26 |

## SUPPLEMENTARY DATA

|                                                     |                                                   |                                                                                                                    |     |
|-----------------------------------------------------|---------------------------------------------------|--------------------------------------------------------------------------------------------------------------------|-----|
| Retinoid X Receptor RXR $\alpha$                    | Human recombinant E. coli                         | 10.0 $\mu$ mol/L ADP- $\beta$ S<br>5.0 nmol/L [ $^3$ H] 9-cis-Retinoic acid<br>1.0 $\mu$ mol/L 9-cis-Retinoic acid | -20 |
| Rolipram                                            | Wistar rat brain                                  | 1.80 nmol/L [ $^3$ H] Rolipram<br>10.0 $\mu$ mol/L Rolipram                                                        | 7   |
| Ryanodine RyR3                                      | Wistar rat cerebral cortex                        | 3.0 nmol/L [ $^3$ H] Ryanodine<br>10.0 $\mu$ mol/L Ryanodine                                                       | -6  |
| Serotonin (5-Hydroxytryptamine) 5-HT $_{1A}$        | Human recombinant CHO-K1 cells                    | 1.50 nmol/L [ $^3$ H] 8-OH-DPAT<br>10.0 $\mu$ mol/L Metergoline                                                    | -11 |
| Serotonin (5-Hydroxytryptamine) 5-HT $_{1B}$        | Wistar rat cerebral cortex                        | 10 pmol/L [ $^{125}$ I] Cyanopindolol<br>10.0 $\mu$ mol/L Serotonin (5-HT)                                         | 7   |
| Serotonin (5-Hydroxytryptamine) 5-HT $_{2B}$        | Human recombinant CHO-K1 cells                    | 1.20 nmol/L [ $^3$ H] Lysergic acid diethylamide (LSD)<br>10.0 $\mu$ mol/L Serotonin (5-HT)                        | 3   |
| Serotonin (5-Hydroxytryptamine) 5-HT $_{2C}$        | Human recombinant CHO-K1 cells                    | 1.0 n ol/L [ $^3$ H] Mesulergine<br>1.0 $\mu$ mol/L Mianserin                                                      | -4  |
| Serotonin (5-Hydroxytryptamine) 5-HT $_3$           | Human recombinant HEK-293 cells                   | 0.69 nmol/L [ $^3$ H] GR-65630<br>10.0 $\mu$ mol/L MDL 72222                                                       | 12  |
| Serotonin (5-Hydroxytryptamine) 5-HT $_4$           | Duncan Hartley derived guinea pig striatum        | 0.70 nmol/L [ $^3$ H] GR-113808<br>30.0 $\mu$ mol/L Serotonin (5-HT)                                               | 2   |
| Serotonin (5-Hydroxytryptamine) 5-HT $_{5A}$        | Human recombinant CHO-K1 cells                    | 1.70 nmol/L [ $^3$ H] Lysergic acid diethylamide (LSD)<br>100 $\mu$ mol/L Serotonin (5-HT)                         | 5   |
| Serotonin (5-Hydroxytryptamine) 5-HT $_6$           | Human recombinant HeLa cells                      | 1.50 nmol/L [ $^3$ H] Lysergic acid diethylamide (LSD)<br>5.0 $\mu$ mol/L Serotonin (5-HT)                         | 1   |
| Sigma $\sigma_1$                                    | Human Jurkat cells                                | 8.0 nmol/L [ $^3$ H] Haloperidol<br>10.0 $\mu$ mol/L Haloperidol                                                   | 6   |
| Sigma $\sigma_2$                                    | Wistar rat brain                                  | 3.0 nmol/L [ $^3$ H] Ifenprodil<br>10.0 $\mu$ mol/L Ifenprodil                                                     | 0   |
| Somatostatin sst1                                   | Human recombinant CHO-K1 cells                    | 0.10 nmol/L [ $^{125}$ I] Tyr $^{11}$ -Somatostatin 14<br>1.0 $\mu$ mol/L Somatostatin-14                          | -16 |
| Somatostatin sst2                                   | Human recombinant CHO-K1 cells                    | 0.030 nmol/L [ $^{125}$ I] Tyr $^{11}$ -Somatostatin 14<br>1.0 $\mu$ mol/L Somatostatin-14                         | -6  |
| Somatostatin sst3                                   | Human recombinant CHO-K1 cells                    | 0.10 nmol/L [ $^{125}$ I] Tyr $^{11}$ -Somatostatin 14<br>1.0 $\mu$ mol/L Somatostatin-14                          | 3   |
| Somatostatin sst4                                   | Human recombinant Chem-1 cells                    | 0.10 nmol/L [ $^{125}$ I] Tyr $^{11}$ -Somatostatin 14<br>1.0 $\mu$ mol/L Somatostatin-14                          | 5   |
| Somatostatin sst5                                   | Human recombinant Chem-1 cells                    | 0.10 nmol/L [ $^{125}$ I] Tyr $^{11}$ -Somatostatin 14<br>1.0 $\mu$ mol/L Somatostatin-14                          | 2   |
| Tachykinin NK1                                      | Human recombinant CHO cells                       | 0.80 nmol/L [ $^3$ H] Substance P<br>10.0 $\mu$ mol/L L-703,606                                                    | 7   |
| Tachykinin NK2                                      | Human recombinant CHO cells                       | 0.50 nmol/L [ $^3$ H] SR-48968<br>2.0 $\mu$ mol/L MEN-10,376                                                       | 1   |
| Tachykinin NK3                                      | Human recombinant CHO cells                       | 0.060 nmol/L [ $^{125}$ I] MePhe $^7$ -Neurokinin B<br>50.0 $\mu$ mol/L Senktide                                   | -7  |
| Thyroid Hormone                                     | Wistar rat liver                                  | 0.030 nmol/L [ $^{125}$ I] Triiodothyronine<br>1.0 $\mu$ mol/L Triiodothyronine                                    | 0   |
| Thyrotropin Releasing Hormone (TRH)                 | Wistar rat brain                                  | 3.0 nmol/L [ $^3$ H] Me-TRH<br>10.0 $\mu$ mol/L TRH                                                                | 2   |
| Transforming Growth Factor- $\beta$ (TGF- $\beta$ ) | Mouse 3T3 cells CCL-92                            | 0.013 nmol/L [ $^{125}$ I] TGF- $\beta_1$<br>0.10 nmol/L TGF- $\beta_1$                                            | -19 |
| Transporter, Adenosine                              | Duncan Hartley derived guinea pig cerebral cortex | 0.50 nmol/L [ $^3$ H] Nitrobenzylthioinosine<br>5.0 $\mu$ mol/L Nitrobenzylthioinosine                             | 4   |
| Transporter, Choline                                | Wistar rat brain striatum                         | 0.75 nmol/L [ $^3$ H] Hemicholinium-3<br>1.0 $\mu$ mol/L Hemicholinium-3                                           | -14 |
| Transporter, Dopamine (DAT)                         | Human recombinant CHO-K1 cells                    | 0.15 nmol/L [ $^{125}$ I] RTI-55<br>10.0 $\mu$ mol/L Nomifensine                                                   | 1   |
| Transporter, GABA                                   | Wistar rat cerebral cortex                        | 6.0 nmol/L [ $^3$ H] GABA<br>10.0 $\mu$ mol/L NO-711                                                               | 6   |
| Transporter, Monoamine                              | New Zealand derived albino rabbit platelets       | 2.0 nmol/L [ $^3$ H] Ketanserin<br>10.0 $\mu$ mol/L Tetrabenazine                                                  | -11 |
| Transporter, Norepinephrine (NET)                   | Human recombinant MDCK cells                      | 0.20 nmol/L [ $^{125}$ I] RTI-55<br>10.0 $\mu$ mol/L Desipramine                                                   | -10 |
| Transporter, Serotonin (5-Hydroxytryptamine) (SERT) | Human recombinant HEK-293 cells                   | 0.40 nmol/L [ $^3$ H] Paroxetine<br>10.0 $\mu$ mol/L Imipramine                                                    | 3   |
| Tumor Necrosis Factor (TNF), Non-Selective          | Human U937 cells                                  | 0.028 nmol/L [ $^{125}$ I] TNF- $\alpha$<br>0.040 $\mu$ mol/L TNF- $\alpha$                                        | 27  |
| Urotensin II                                        | Human recombinant CHO-K1 cells                    | 0.10 nmol/L [ $^{125}$ I] Urotensin II<br>1.0 $\mu$ mol/L Urotensin II                                             | 10  |
| Vanilloid                                           | Wistar rat spinal cord                            | 0.20 nmol/L [ $^3$ H] Resiniferatoxin<br>0.10 $\mu$ mol/L Resiniferatoxin                                          | -1  |
| Vasoactive Intestinal Peptide VIP $_1$              | Human HT29 colon adenocarcinoma cells             | 10 pmol/L [ $^{125}$ I] VIP<br>1.0 $\mu$ mol/L VIP                                                                 | -5  |
| Vasopressin V $_{1A}$                               | Human recombinant HEK-293 cells                   | 0.030 nmol/L [ $^{125}$ I] PhenylacetylTyr(Me)PheGlnAsnArgProArgTyr<br>1.0 $\mu$ mol/L (Arg $^8$ )-Vasopressin     | 9   |
| Vasopressin V $_{1B}$                               | Human recombinant CHO cells                       | 1.0 nmol/L [ $^3$ H] (Arg $^8$ )-Vasopressin                                                                       | -1  |

## SUPPLEMENTARY DATA

|                            |                                |                                                                                                                                                          |   |
|----------------------------|--------------------------------|----------------------------------------------------------------------------------------------------------------------------------------------------------|---|
| Vasopressin V <sub>2</sub> | Human recombinant CHO cells    | 1.0 µmol/L (Arg <sup>8</sup> )-Vasopressin<br>4.0 nmol/L [ <sup>3</sup> H] (Arg <sup>8</sup> )-Vasopressin<br>1.0 µmol/L (Arg <sup>8</sup> )-Vasopressin | 4 |
| Vitamin D <sub>3</sub>     | Human recombinant insect cells | 0.30 nmol/L [ <sup>3</sup> H] 1α, 25-Dihydroxyvitamin D <sub>3</sub><br>0.5 µmol/L 1α, 25-Dihydroxyvitamin D <sub>3</sub>                                | 0 |

Items meeting criteria for significance ( $\geq 50\%$  stimulation or inhibition) are highlighted in grey. gp=Guinea pig; ham=Hamster; hum=Human

### Supplementary Reagent Tables

#### Antibodies for flow cytometry and cell sorting:

| Antibody                | Clone        | Conjugate     | Source         | Dilution |
|-------------------------|--------------|---------------|----------------|----------|
| CD16/32 (FC block)      | 93           | N/A           | eBioscience    | 1:400    |
| Viability dye eFluor450 | N/A          | N/A           | eBioscience    | 1:1000   |
| CD45                    | 30-F11       | FITC          | eBioscience    | 1:1000   |
| CD115                   | AFS98        | PE            | eBioscience    | 1:100    |
| GR1                     | RB6-8C5      | PE-Cy7        | eBioscience    | 1:2000   |
| B220                    | RA3-6B2      | APC           | eBioscience    | 1:500    |
| CD3e                    | 145-2C11     | APC           | eBioscience    | 1:500    |
| CD11B                   | M1/70        | PerCP-Cy5.5   | eBioscience    | 1:1000   |
| CD11B                   | M1/70        | Biotin        | eBioscience    | 1:600    |
| F4/80                   | BM8          | Biotin        | eBioscience    | 1:100    |
| GR1                     | RB6-8C5      | Biotin        | eBioscience    | 1:600    |
| CD11C                   | N418         | Biotin        | eBioscience    | 1:100    |
| CD3                     | eBio500A2    | Biotin        | eBioscience    | 1:100    |
| NK1.1                   | PK136        | Biotin        | eBioscience    | 1:100    |
| CD34                    | RAM34        | FITC          | eBioscience    | 1:10     |
| Sca-1                   | D7           | PerCP-Cy5.5   | eBioscience    | 1:100    |
| CD135                   | A2F10        | APC           | BioLegend      | 1:100    |
| CD117                   | 2B8          | PE-Cy7        | eBioscience    | 1:100    |
| CD16/32                 | 93           | PE            | eBioscience    | 1:100    |
| Streptavidin            | N/A          | APC-eFluor780 | eBioscience    | 1:100    |
| Sca-1                   | D7           | BV510         | BioLegend      | 1:100    |
| CD48                    | HM48-1       | Af647         | BioLegend      | 1:100    |
| CD150                   | TC15-12F12.2 | Pacific Blue  | BioLegend      | 1:100    |
| p-ERK                   | 197G2        | PE            | Cell signaling | 1:100    |
| CD34                    | Qbend-10     | FITC          | Abcam          | 1:50     |
| CD38                    | HIT2         | Alexa-647     | BioLegend      | 1:20     |
| CD68                    | FA-11        | N/A           | BioRad         | 1:50     |

SUPPLEMENTARY DATA

**Antibodies for Western blot analysis:**

| Antibody             | Description                                        | Product number |
|----------------------|----------------------------------------------------|----------------|
| Phospho-Akt          | polyclonal rabbit anti-mouse Ser473-Akt            | 9271           |
| Total Akt            | polyclonal rabbit anti-mouse Akt                   | 9272           |
| Phospho-Erk1/2       | polyclonal rabbit anti-mouse Thr202/Tyr204-Erk     | 9101           |
| Phospho-GSK3 $\beta$ | monoclonal rabbit anti-human Ser9-GSK3 $\beta$ IgG | 5558           |
| Total GSK3 $\beta$   | monoclonal rabbit anti-human GSK3 $\beta$ IgG      | 9315           |
| Phospho-p38 MAPK     | monoclonal rabbit anti-Thr180/182 p38 MAPK; 12F8   | 4631           |
| Total p38 MAPK       | polyclonal rabbit anti-human p38 MAPK              | 9212           |
| Phospho-JNK          | monoclonal mouse anti-Thr183/Tyr185 JNK IgG1, G9   | 9255           |
| Total JNK            | polyclonal rabbit anti-human JNK2                  | 9252           |

All the above antibodies were obtained from Cell Signaling Technologies and were used according to the manufacturer's instructions for Western blots.

**Antibodies for immunohistochemistry:**

| Antibody                      | Staining            | Description                                          | Source                     |
|-------------------------------|---------------------|------------------------------------------------------|----------------------------|
| Mac-2                         | macrophages         | clone M3/38; monoclonal rat anti-mouse IgG2a         | Cedarlane Laboratories     |
| Cleaved caspase 3             | apoptotic cells     | Asp175; polyclonal rabbit anti-human IgG, #9661      | Cell Signaling Technology  |
| Smooth muscle $\alpha$ -actin | smooth muscle cells | clone 1A4, monoclonal mouse anti-human IgG2a         | Dako                       |
| Ki67                          | proliferating cells | polyclonal rabbit anti-mouse Ki67, #NB110-89719      | Novus Biologicals          |
| VCAM-1                        | VCAM-1              | polyclonal rabbit anti-human VCAM-1, H-276, #sc-8304 | Santa Cruz Biotechnologies |

Other sections were subjected to terminal deoxynucleotidyl transferase dUTP nick end labeling (TUNEL; Roche Applied Science, Indianapolis, IN) after proteinase K treatment as directed by the manufacturer. DNase treatment (500 units/ml for 30 min at 37°) was used as a positive control for the TUNEL assay. The anti-cleaved caspase 3 (Asp175) (5A1) antibody detects the large fragment (17/19 kDa) of activated caspase 3 resulting from cleavage adjacent to Asp175, and does not crossreact with full length caspase 3 or other cleaved caspases. To detect proliferating cells using the Ki67 antigen, cross sections from paraffin-embedded BCAs were deparaffinized and rehydrated, and then incubated in a hot antigen retrieval buffer (10 mM sodium citrate, 0.05% and Tween 20, pH 6.0) for 40 min. The Ki67 antibody (1 mg/ml) was used at a final dilution of 1:200.

SUPPLEMENTARY DATA

**Supplementary Primer Table. Primers for real-time PCR**

| <b>Gene</b>  | <b>Primer sequences</b>                                            | <b>Source</b>      |
|--------------|--------------------------------------------------------------------|--------------------|
| <i>Ccl2</i>  | F 5'-TTAAAAACCTGGATCGGAACCAA-3'<br>R 5'-GCATTAGCTTCAGATTTACGGGT-3' | Invitrogen         |
| <i>Ccnd1</i> | F 5'-GCGTACCCTGACACCAATCTC-3'<br>R 5'-CTCCTCTTCGCACTTCTGCTC-3'     | Invitrogen         |
| <i>Emr1</i>  | F 5'-TGACTCACCTTGTGGTCCTAA-3'<br>R 5'-CTTCCCAGAATCCAGTCTTTCC-3'    | Invitrogen         |
| <i>Fasn</i>  | F 5'-GGAGGTGGTGATAGCCGGTAT-3'<br>R 5'-TGGGTAATCCATAGAGCCCAG-3'     | Invitrogen         |
| <i>Gapdh</i> | F 5'-AGGTCCGTGTGAACGGATTTG-3'<br>R 5'-TGTAGACCATGTAGTTGAGGTCA-3'   | Invitrogen         |
| <i>Hmgcr</i> | F 5'-TGTTACCGGCAACAACAAGA-3'<br>R 5'-CCGCGTTATCGTCAGGATGA-3'       | Invitrogen         |
| <i>Igf1r</i> | #Mn00802831_m1                                                     | Applied Biosystems |
| <i>Il6</i>   | F 5'-TAGTCCTTCTACCCCAATTTCC-3'<br>R 5'-TTGGTCCTTAGCCACTCCTTC-3'    | Invitrogen         |
| <i>Insr</i>  | #Mn01211875_m1                                                     | Applied Biosystems |
| <i>Pepck</i> | F 5'-CTGCATAACGGTCTGGACTTC-3'<br>R 5'-CAGCAACTGCCCGTACTCC-3'       | Invitrogen         |
| <i>Ppib</i>  | #Mn00478295_m1                                                     | Applied Biosystems |
| <i>Rn18s</i> | F 5'-CATTAAATCAGTTATGGTTCCTTTGG-3'<br>R 5'-CCCGTCGGCATGTATTAGCT-3' | Invitrogen         |
| <i>Rpn32</i> | F 5'-TTAAGCGAAACTGGCGGAAAC-3'<br>R 5'-TTGTTGCTCCCATAAACCGATG-3'    | Invitrogen         |
| <i>Scd1</i>  | F 5'-TTCTTGCGATACACTCTGGTGC-3'<br>R 5'-CGGGATTGAATGTTCTTGTCGT-3'   | Invitrogen         |
| <i>Tnfa</i>  | F 5'-CCCTCACACTCAGATCATCTTCT-3'<br>R 5'-GCTACGACGTGGGCTACAG-3'     | Invitrogen         |

|              |                                                                   |            |
|--------------|-------------------------------------------------------------------|------------|
| <i>Vcam1</i> | F 5'-TGCACAGTCCCTAATGTGTATCC-3'<br>R 5'-GACTTTATGCCCATTTCTCCA-3'  | Invitrogen |
| <i>Nos2</i>  | F 5'-GTTCTCAGCCCAACAATAACAAGA-3'<br>R 5'-GTGGACGGGTCGATGTCAC-3'   | Invitrogen |
| <i>Il1b</i>  | F 5'-GGGCTGCTTCCAAACCTTTG-3'<br>R 5'-TGATACTGCCTGCCTGAAGCTC-3'    | Invitrogen |
| <i>Il6</i>   | F 5'-TAGTCCTTCTACCCCAATTTCC-3'<br>R 5'-TTGGTCCTTAGCCACTCCTTC-3'   | Invitrogen |
| <i>Ym1</i>   | F 5'-AGAAGGGAGTTTCAAACCTGG-3'<br>R 5'-GTCTTGCTCATGTGTGTAAGTG-3'   | Invitrogen |
| <i>Arg1</i>  | F 5'-CTCCAAGCCAAAGTCCTTAGAG-3'<br>R 5'-AGGAGCTGTCATTAGGGACATCA-3' | Invitrogen |
